# Supplementary material for: Exploiting Nonlinear Recurrence and Fractal Scaling Properties for Voice Disorder Detection
Source: Springer Nature journal article supplement (doi:10.1186/1475-925x-6-23), 2007-01-01

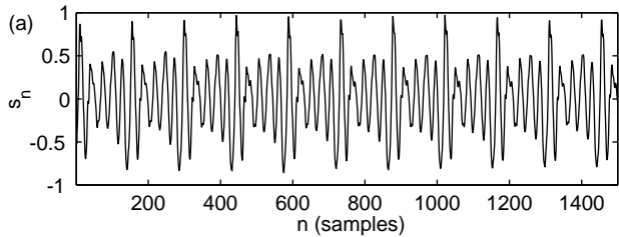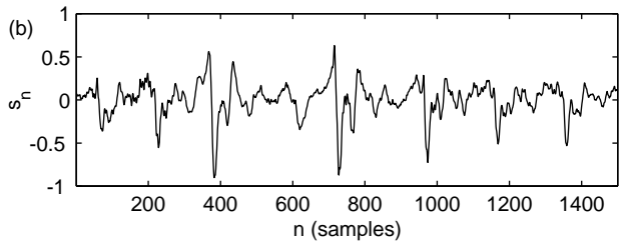

Supplement: 12938_2007_231_MOESM6_ESM.pdf [file 12938_2007_231_MOESM6_ESM.pdf]
